# Supplementary material
Source: Research Square preprint supplement (doi:10.21203/rs.3.rs-8916716/v1)
Supplement: Supplementary file 1 [file 42a7092654d71feae0aeff6c.docx]

The checklist was developed for this study:

| Serial Number |  | | |
| --- | --- | --- | --- |
| **PART I : SOCIODEMOGRAPHIC DATA** | | | |
| Sex |  | | |
| Age |  | | |
| Address |  | | |
| Weight |  | | |
| Tribe |  | | |
| Occupation |  | | |
| Educational level |  | | |
| **PART II : PRESENTING FEATURES** | | | |
| Knee pain |  | | |
| Swelling |  | | |
| Stiffness/Limited range of motion |  | | |
| Instability of joint/Difficult in walking |  | | |
| Popping sensation |  | | |
| Knee locking |  | | |
| Mechanism of injuries |  | | |
| **PART III : SONOGRAPHIC FEATURES** | | | |
| INJURY PART | SONOGRAPHIC FEATURES | YES/NO RESPONSE | STATUS |
| Medial meniscal injuries | Loss of wedge (triangular) shaped appearance |  |  |
|  | Loss of uniform echo pattern through-out the meniscus |  |  |
| Increased vascularity in Colour Doppler |  |  |
| Lateral meniscal injuries | Loss of wedge (triangular) shaped appearance |  |  |
| Loss of uniform echopattern through-out the meniscus |  |  |
| Increased vascularity in Colour Doppler |  |  |
| Medial collateral ligament | Loss of linear shaped appearance |  |  |
| Loss of uniform echopattern throughout the course |  |  |
| Increased vascularity on Colour Doppler |  |  |
| Lateral collateral ligament | Loss of linear shaped appearance |  |  |
| Loss of uniform echopattern throughout the course |  |  |
| Increased vascularity on Colour Doppler |  |  |
| Anterior cruciate ligament | Inhomogeneous hypoechoic |  |  |
| Loss of sharply defined posterior border |  |  |
| Increased vascularity on Colour Doppler |  |  |
| Posterior cruciate ligament | Increased in size: Thickness more than 10mm |  |  |
| Inhomogenous hypoechoic |  |  |
| Loss of sharply defined posterior border |  |  |
| Increased vascularity on Colour Doppler |  |  |
| **PART IV: MRI FINDINGS** | | | |
| INJURY ORGAN | MRI FEATURES | YES/NO RESPONSE | STATUS |
| Medial Meniscal Injury | Abnormally loss of bow-tie configuration |  |  |
| Elevation of signal intensities |  |  |
| Abnormally displaced fragment |  |  |
| Edema/effusion |  |  |
| Lateral meniscal injury | Abnormally loss of bow-tie configuration |  |  |
| Elevation of signal intensities |  |  |
| Abnormally displaced fragment |  |  |
| Edema/effusion |  |  |
| Medial collateral injury | Ligament interruption with fragment or lack of depiction |  |  |
| Abnormally inclined course of ligament portions with a clear deviation |  |  |
| Abnormally signal elevation |  |  |
| Fluid equivalent signal within ligament (edema/effusion) |  |  |
| Lateral collateral injury | Ligament interruption with fragment or lack of depiction |  |  |
| Abnormally inclined course of ligament portions with a clear deviation |  |  |
| Abnormally signal elevation |  |  |
| Fluid equivalent signal within ligament (edema/effusion) |  |  |
| Anterior cruciate ligament | Ligament interruption with fragment or lack of depiction |  |  |
| Abnormally inclined course of ligament portions with a clear deviation |  |  |
| Abnormally signal elevation |  |  |
| Fluid equivalent signal within ligament (edemaeffusion) |  |  |
| Posterior cruciate ligament | Ligament interruption with fragment or lack of depiction |  |  |
| Abnormally inclined course of ligament portions with a clear deviation |  |  |
| Abnormally signal elevation |  |  |
| Fluid equivalent signal within ligament (edema/effusion) |  |  |
